# Supplementary material for: Genome-wide evidence for speciation with gene flow in Heliconius butterflies
Source: HighWire-hosted journal article supplement (doi:10.1101/gr.159426.113), 2013-09-17
Supplement: Supp_Table_S1.pdf [file Supp_Table_S1.pdf]

**Table S1. Sample information, whole-genome resequencing statistics and levels of variation**

| ID     | taxon                             | sex | country          | latitude | longitude | sequencing<br>centre <sup>1</sup> | mean<br>read<br>depth | high quality<br>calls, QUAL<br>> 30, GQ>30 | %<br>genome | homozygou<br>s reference<br>calls | %<br>hom<br>ref | heterozygous<br>calls | %<br>het | homozygous<br>alternative<br>calls | %<br>hom<br>alt | ts/tv <sup>2</sup> | nucleotide<br>diversity |
|--------|-----------------------------------|-----|------------------|----------|-----------|-----------------------------------|-----------------------|--------------------------------------------|-------------|-----------------------------------|-----------------|-----------------------|----------|------------------------------------|-----------------|--------------------|-------------------------|
| 531    | <i>H. melpomene<br/>rosina</i>    | M   | Panama           | 9.1206 N | 79.6969 W | GenePool                          | 26.9                  | 173756009                                  | 63.5        | 168999083                         | 97.3            | 3299296               | 1.9      | 1457630                            | 0.8             | 1.34               | 0.011                   |
| 533    | <i>H. melpomene<br/>rosina</i>    | M   | Panama           | 9.1206 N | 79.6969 W | GenePool                          | 26.7                  | 169196141                                  | 61.8        | 164616728                         | 97.3            | 3218505               | 1.9      | 1360908                            | 0.8             | 1.35               |                         |
| 546    | <i>H. melpomene<br/>rosina</i>    | M   | Panama           | 9.1206 N | 79.6969 W | GenePool                          | 26.5                  | 168777709                                  | 61.6        | 164233376                         | 97.3            | 3201240               | 1.9      | 1343093                            | 0.8             | 1.35               |                         |
| 2071   | <i>H. melpomene<br/>rosina</i>    | M   | Panama           | 9.1206 N | 79.6969 W | GenePool                          | 36.7                  | 192118461                                  | 70.2        | 186349747                         | 97.0            | 3907084               | 2.0      | 1861630                            | 1.0             | 1.29               |                         |
| 9315   | <i>H. melpomene<br/>melpomene</i> | M   | French<br>Guiana | 4.9632 N | 52.4200 W | GenePool                          | 24.1                  | 172131172                                  | 62.9        | 166649482                         | 96.8            | 2944742               | 1.7      | 2536948                            | 1.5             | 1.35               | 0.010                   |
| 9316   | <i>H. melpomene<br/>melpomene</i> | M   | French<br>Guiana | 4.9632 N | 52.4200 W | GenePool                          | 23.1                  | 165556522                                  | 60.5        | 160449755                         | 96.9            | 2826210               | 1.7      | 2280557                            | 1.4             | 1.36               |                         |
| 9317   | <i>H. melpomene<br/>melpomene</i> | M   | French<br>Guiana | 4.9632 N | 52.4200 W | GenePool                          | 35.0                  | 188558223                                  | 68.9        | 181987552                         | 96.5            | 3331861               | 1.8      | 3238810                            | 1.7             | 1.31               |                         |
| 13435  | <i>H. melpomene<br/>melpomene</i> | M   | French<br>Guiana | 4.9151 N | 52.3755 W | GenePool                          | 35.8                  | 189676258                                  | 69.3        | 183014648                         | 96.5            | 3403983               | 1.8      | 3257627                            | 1.7             | 1.31               |                         |
| 1      | <i>H. melpomene<br/>melpomene</i> | ?   | Panama           | 8.6136 N | 78.1398 W | GenePool                          | 23.0                  | 205457597                                  | 75.0        | 204003629                         | 99.3            | 1451816               | 0.7      | 2152                               | 0.0             | 1.26               | 0.011                   |
| 18038  | <i>H. melpomene<br/>melpomene</i> | F   | Panama           | 8.6136 N | 78.1398 W | GenePool                          | 62.0                  | 200772018                                  | 73.3        | 194535256                         | 96.9            | 4107267               | 2.0      | 2129495                            | 1.1             | 1.28               |                         |
| 18097  | <i>H. melpomene<br/>melpomene</i> | M   | Panama           | 8.2797 N | 77.8098 W | GenePool                          | 15.6                  | 128839980                                  | 47.1        | 125364711                         | 97.3            | 2463134               | 1.9      | 1012135                            | 0.8             | 1.38               |                         |
| 11-48  | <i>H. melpomene<br/>amaryllis</i> | M   | Peru             | 6.0960 S | 76.9774 W | FAS                               | 55.6                  | 203382502                                  | 74.3        | 195316567                         | 96.0            | 4548273               | 2.2      | 3517662                            | 1.7             | 1.25               | 0.013                   |
| 11-160 | <i>H. melpomene<br/>amaryllis</i> | F   | Peru             | 6.4685 S | 76.3533 W | FAS                               | 44.0                  | 202419813                                  | 73.9        | 194682847                         | 96.2            | 4264767               | 2.1      | 3472199                            | 1.7             | 1.26               |                         |
| 09-216 | <i>H. melpomene<br/>amaryllis</i> | M   | Peru             | 5.6756 S | 77.6747 W | FAS                               | 32.6                  | 199850729                                  | 73.0        | 192459782                         | 96.3            | 4221690               | 2.1      | 3169257                            | 1.6             | 1.27               |                         |
| 11-293 | <i>H. melpomene<br/>amaryllis</i> | F   | Peru             | 6.4703 S | 76.3473 W | FAS                               | 53.3                  | 203132880                                  | 74.2        | 195213283                         | 96.1            | 4346893               | 2.1      | 3572704                            | 1.8             | 1.25               |                         |
| 09-108 | <i>H. melpomene</i>               | M   | Peru12           | 5.9103 S | 76.2258 W | FAS                               | 36.6                  | 196980199                                  | 71.9        | 189754332                         | 96.3            | 4138437               | 2.1      | 3087430                            | 1.6             | 1.28               | 0.013                   |

|        |                                |   |        |          |           |          |      |           |      |           |                    |         |     |         |     |      |
|--------|--------------------------------|---|--------|----------|-----------|----------|------|-----------|------|-----------|--------------------|---------|-----|---------|-----|------|
|        | <i>aglaope</i>                 |   |        |          |           |          |      |           |      |           |                    |         |     |         |     |      |
| 09-112 | <i>H. melpomene aglaope</i>    | M | Peru   | 5.9103 S | 76.2258 W | FAS      | 38.9 | 201571827 | 73.6 | 193931834 | 96.2               | 4355468 | 2.2 | 3284525 | 1.6 | 1.27 |
| 11-569 | <i>H. melpomene aglaope</i>    | M | Peru   | 5.9458 S | 76.2453 W | FAS      | 44.4 | 202076594 | 73.8 | 194329380 | 96.2               | 4403693 | 2.2 | 3343521 | 1.7 | 1.27 |
| 11-572 | <i>H. melpomene aglaope</i>    | M | Peru   | 5.9458 S | 76.2466 W | FAS      | 37.4 | 200353281 | 73.2 | 192856619 | 96.3               | 4297728 | 2.1 | 3198934 | 1.6 | 1.27 |
| 553    | <i>H. cydno chioneus</i>       | M | Panama | 9.1714 N | 79.7573 W | GenePool | 35.8 | 187496457 | 68.5 | 180531193 | 96.31 <sub>2</sub> | 3971128 | 2.1 | 2994136 | 1.6 | 1.28 |
| 560    | <i>H. cydno chioneus</i>       | M | Panama | 9.1714 N | 79.7573 W | GenePool | 35.3 | 188841274 | 69.0 | 181878294 | 96.3               | 3904927 | 2.1 | 3058053 | 1.6 | 1.28 |
| 564    | <i>H. cydno chioneus</i>       | M | Panama | 9.1714 N | 79.7573 W | GenePool | 39.2 | 188356346 | 68.8 | 181303275 | 96.3               | 4038599 | 2.1 | 3014472 | 1.6 | 1.28 |
| 565    | <i>H. cydno chioneus</i>       | M | Panama | 9.1714 N | 79.7573 W | GenePool | 46.0 | 193728169 | 70.8 | 186243283 | 96.1               | 4223905 | 2.2 | 3260981 | 1.7 | 1.26 |
| 09-57  | <i>H. timareta thelxinoe</i>   | M | Peru   | 6.4550 S | 76.2983 W | FAS      | 45.8 | 201925567 | 73.7 | 194366548 | 96.3               | 3546884 | 1.8 | 4012135 | 2.0 | 1.34 |
| 09-84  | <i>H. timareta thelxinoe</i>   | M | Peru   | 6.4550 S | 76.2983 W | FAS      | 32.0 | 195759965 | 71.5 | 188772959 | 96.4               | 3365674 | 1.7 | 3621332 | 1.8 | 1.27 |
| 09-86  | <i>H. timareta thelxinoe</i>   | M | Peru   | 6.4550 S | 76.2983 W | FAS      | 45.6 | 202568221 | 74.0 | 194926501 | 96.2               | 3602687 | 1.8 | 4039033 | 2.0 | 1.25 |
| 09-313 | <i>H. timareta thelxinoe</i>   | M | Peru   | 6.4531 S | 76.2886 W | FAS      | 42.0 | 202371330 | 73.9 | 194848222 | 96.3               | 3478024 | 1.7 | 4045084 | 2.0 | 1.25 |
| 09-371 | <i>H. pardalinus ssp. nov.</i> | M | Peru   | 8.3425 S | 74.5922 W | FAS      | 42.0 | 190677937 | 69.6 | 180602761 | 94.7               | 5747677 | 3.0 | 4327499 | 2.3 | 1.27 |
| 09-202 | <i>H. pardalinus sergestus</i> | M | Peru   | 6.4778 S | 76.3517 W | FAS      | 41.6 | 191285431 | 69.9 | 183387825 | 95.9               | 2325748 | 1.2 | 5571858 | 2.9 | 1.26 |
| 09-67  | <i>H. ethilla aerotome</i>     | M | Peru   | 6.4667 S | 76.3347 W | FAS      | 45.5 | 192825749 | 70.4 | 184093324 | 95.5               | 1776222 | 0.9 | 6956203 | 3.6 | 1.25 |
| 09-273 | <i>H. hecale felix</i>         | F | Peru   | 5.9717 S | 76.2319 W | FAS      | 44.2 | 191658803 | 70.0 | 182719189 | 95.3               | 3278707 | 1.7 | 5660907 | 3.0 | 1.25 |

0.013

0.010

<sup>1</sup> FAS: FAS Center for Systems Biology, Harvard University; GenePool: The GenePool, University of Edinburgh

<sup>2</sup> The ratio of transitions to transversions with respect to the reference. The differences between individuals are consistent with theoretical expectations given differences in coverage. In coding regions, the nature of the genetic code ensures that transversions are more often non-synonymous, and thus more likely to be selected against. In this dataset, Ts/Tv tends to be higher in genomes with lower coverage, which should contain proportionally more coding sequence ( $r^2 = 0.67$ ).

**Table S2. Numbers of genomic windows supporting each of four topologies**

| window<br>size (kb)                                          | species tree |                |                        | geography tree |                |                        | control tree |                |                        | unresolved |                |
|--------------------------------------------------------------|--------------|----------------|------------------------|----------------|----------------|------------------------|--------------|----------------|------------------------|------------|----------------|
|                                                              | count        | % all<br>trees | %<br>resolved<br>trees | count          | % all<br>trees | %<br>resolved<br>trees | count        | % all<br>trees | %<br>resolved<br>trees | count      | % all<br>trees |
| <b>Dataset 1: cydno,rosina,melpomene[FG],Outgroups</b>       |              |                |                        |                |                |                        |              |                |                        |            |                |
| 10                                                           | 7753         | 38.0           | 53.8                   | 6230           | 30.6           | 43.2                   | 438          | 2.1            | 3.0                    | 5960       | 29.2           |
| 20                                                           | 5350         | 45.1           | 54.0                   | 4343           | 36.6           | 43.9                   | 211          | 1.8            | 2.1                    | 1971       | 16.6           |
| 50                                                           | 2715         | 50.8           | 54.2                   | 2214           | 41.4           | 44.2                   | 77           | 1.4            | 1.5                    | 338        | 6.3            |
| 100                                                          | 1510         | 53.0           | 55.0                   | 1201           | 42.2           | 43.8                   | 32           | 1.1            | 1.2                    | 105        | 3.7            |
| 200                                                          | 794          | 55.8           | 56.8                   | 589            | 41.4           | 42.2                   | 14           | 1.0            | 1.0                    | 25         | 1.8            |
| <b>Dataset 2: timareta,amaryllis,melpomene[FG],Outgroups</b> |              |                |                        |                |                |                        |              |                |                        |            |                |
| 10                                                           | 5345         | 27.2           | 72.1                   | 1724           | 8.8            | 23.3                   | 341          | 1.7            | 4.6                    | 12260      | 62.3           |
| 20                                                           | 3946         | 34.4           | 70.7                   | 1374           | 12.0           | 24.6                   | 263          | 2.3            | 4.7                    | 5883       | 51.3           |
| 50                                                           | 2664         | 47.8           | 72.5                   | 878            | 15.8           | 23.9                   | 132          | 2.4            | 3.6                    | 1898       | 34.1           |
| 100                                                          | 1304         | 53.2           | 71.5                   | 454            | 18.5           | 24.9                   | 67           | 2.7            | 3.7                    | 628        | 25.6           |
| 200                                                          | 697          | 61.8           | 73.9                   | 215            | 19.1           | 22.8                   | 31           | 2.8            | 3.3                    | 184        | 16.3           |

**Table S3. Mean and standard errors for  $F_{ST}$  values of non-overlapping 100 kb windows**

| relationship       | population pair                          | WG             | autosomes      | Z chromosome   |
|--------------------|------------------------------------------|----------------|----------------|----------------|
| parapatric races   | <i>amaryllis</i> : <i>aglaope</i>        | 0.009 +- 0.001 | 0.010 +- 0.000 | 0.002 +- 0.001 |
|                    | <i>rosina</i> : <i>melpomene</i> (Pan)   | 0.038 +- 0.001 | 0.040 +- 0.000 | 0.048 +- 0.002 |
| allopatric races   | <i>amaryllis</i> : <i>melpomene</i> (FG) | 0.226 +- 0.002 | 0.227 +- 0.001 | 0.339 +- 0.006 |
|                    | <i>rosina</i> : <i>melpomene</i> (FG)    | 0.350 +- 0.002 | 0.349 +- 0.001 | 0.443 +- 0.005 |
|                    | <i>rosina</i> : <i>amaryllis</i>         | 0.294 +- 0.002 | 0.295 +- 0.001 | 0.379 +- 0.005 |
| sympatric species  | <i>amaryllis</i> : <i>timareta</i>       | 0.287 +- 0.003 | 0.282 +- 0.002 | 0.672 +- 0.004 |
|                    | <i>rosina</i> : <i>cydno</i>             | 0.292 +- 0.003 | 0.286 +- 0.001 | 0.515 +- 0.004 |
| allopatric species | <i>cydno</i> : <i>timareta</i>           | 0.357 +- 0.001 | 0.358 +- 0.001 | 0.442 +- 0.003 |
|                    | <i>melpomene</i> (FG) : <i>timareta</i>  | 0.419 +- 0.003 | 0.415 +- 0.002 | 0.716 +- 0.004 |
|                    | <i>rosina</i> : <i>timareta</i>          | 0.393 +- 0.003 | 0.385 +- 0.001 | 0.702 +- 0.004 |
|                    | <i>amaryllis</i> : <i>cydno</i>          | 0.374 +- 0.002 | 0.377 +- 0.001 | 0.440 +- 0.004 |
|                    | <i>melpomene</i> (FG) : <i>cydno</i>     | 0.439 +- 0.002 | 0.440 +- 0.001 | 0.540 +- 0.003 |

“*aglaope*”: *H. m. aglaope*, “*amaryllis*”: *H. m. amaryllis*, “*rosina*”: *H. m. rosina*, “*melp.*”: *H. m. melpomene*, “*cydno*”: *H.*

*c. chioneus*, “*timareta*”: *H. t. thelxinoe*, “Pan”: Panama, “FG”: French Guiana”

## Supplementary Figures

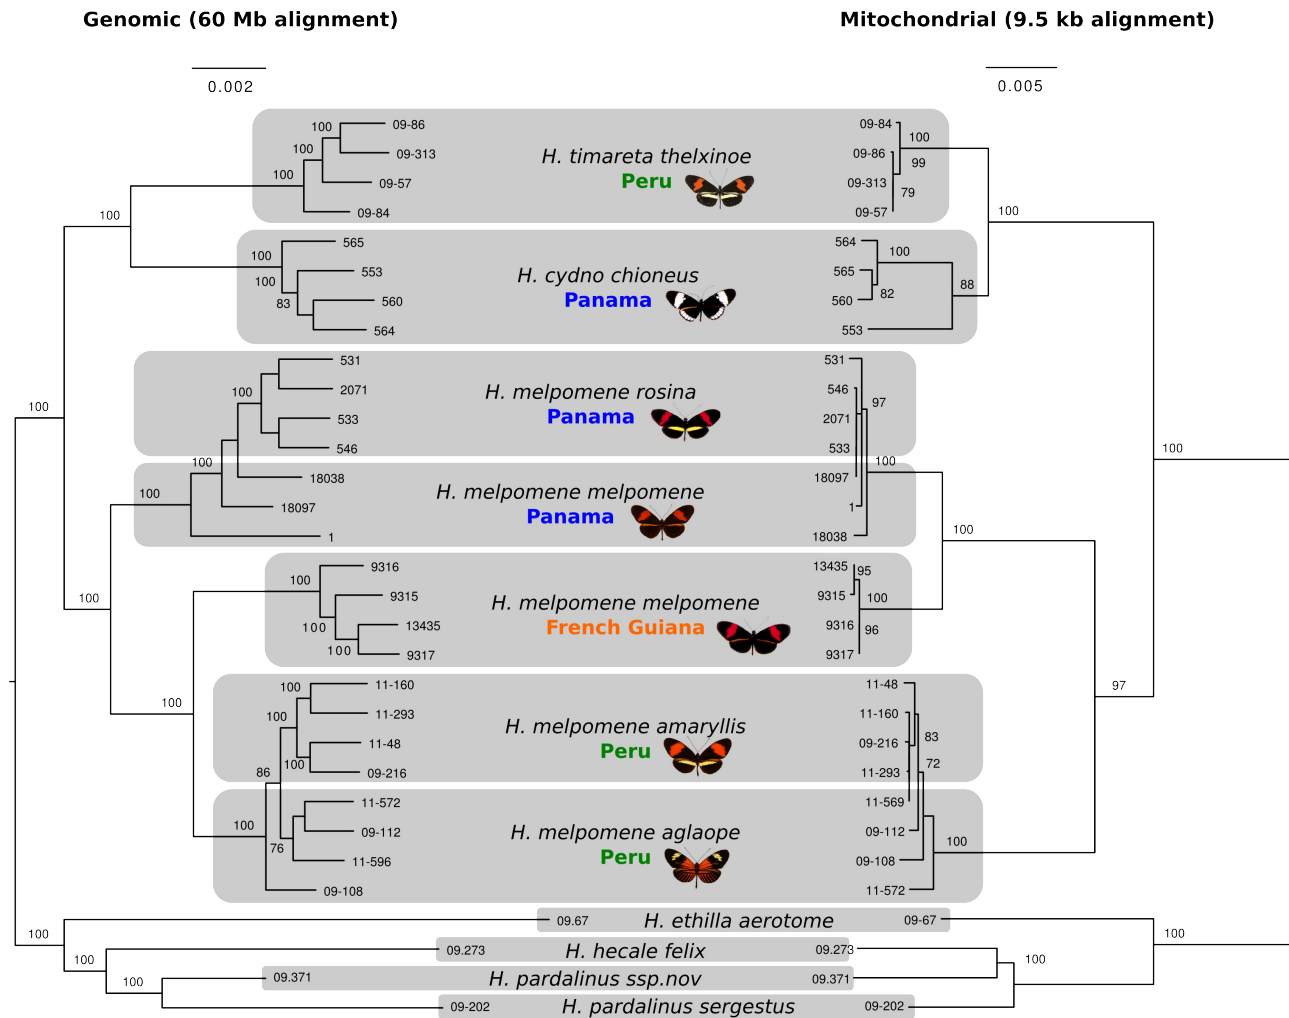

**Figure S1. Genome-wide and mitochondrial maximum-likelihood phylogenies**

Both trees were generated using RAxML, using GTRGAMMA model, with 100 bootstrap replicates for the whole-genome tree and 1000 for the mitochondrial tree. Bootstrap supports  $\geq 90\%$  are displayed. The alignments consisted of all sites that had a high quality genotype call for all 31 genomes analysed.

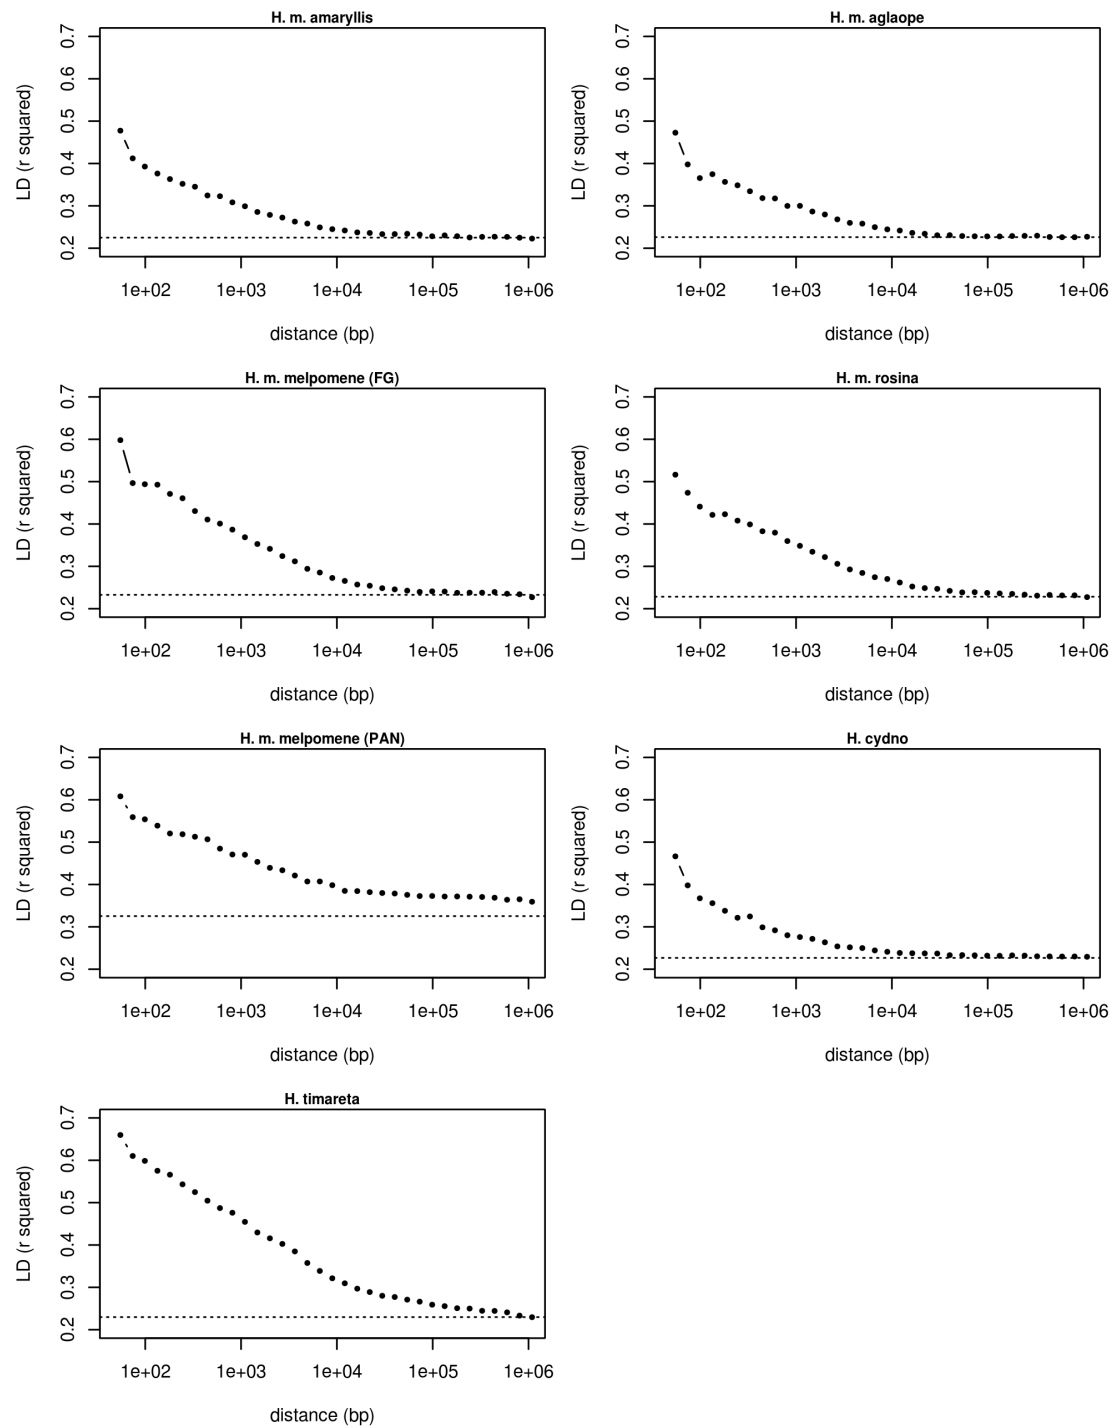

**Figure S2. Decay of genome-wide linkage disequilibrium (LD) with distance**

$r^2$  values were averaged in bins by distance, with bin size increasing logarithmically. Distance is plotted on a logarithmically scaled axis. The dashed line indicates the genomic background LD between unlinked SNPs on separate chromosomes. This level is expected to be non-zero due to small sample size. 95% confidence intervals were all too narrow to display ( $<0.002$ ). In most populations, LD drops to background between 10 kb and 100 kb. The exceptions are *H. timareta*, where the decline is somewhat slower and *H. m. melpomene* (PAN), where LD does not reach the background level due to the presence of a highly inbred individual in this sample.

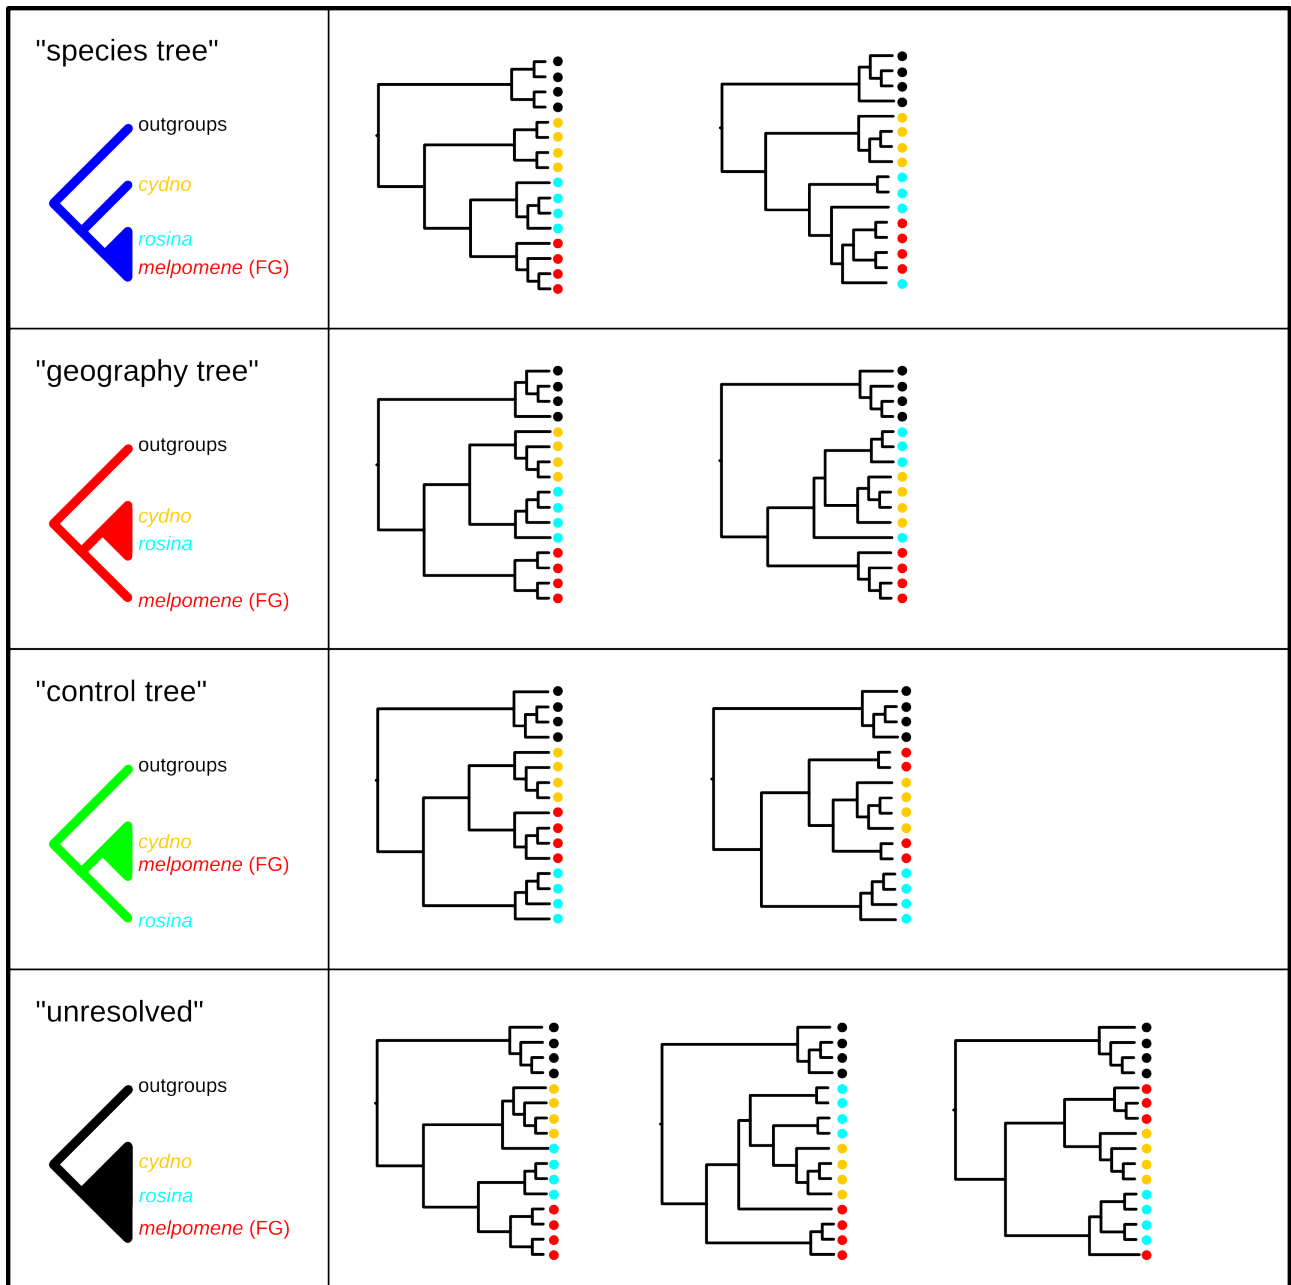

**Figure S3. Examples of trees matching the four types of topologies**

This figure serves to clarify how trees were assigned to one of the four possible topologies described in Fig. 2 and Table S2. See the Results section of the main paper for a verbal explanation.

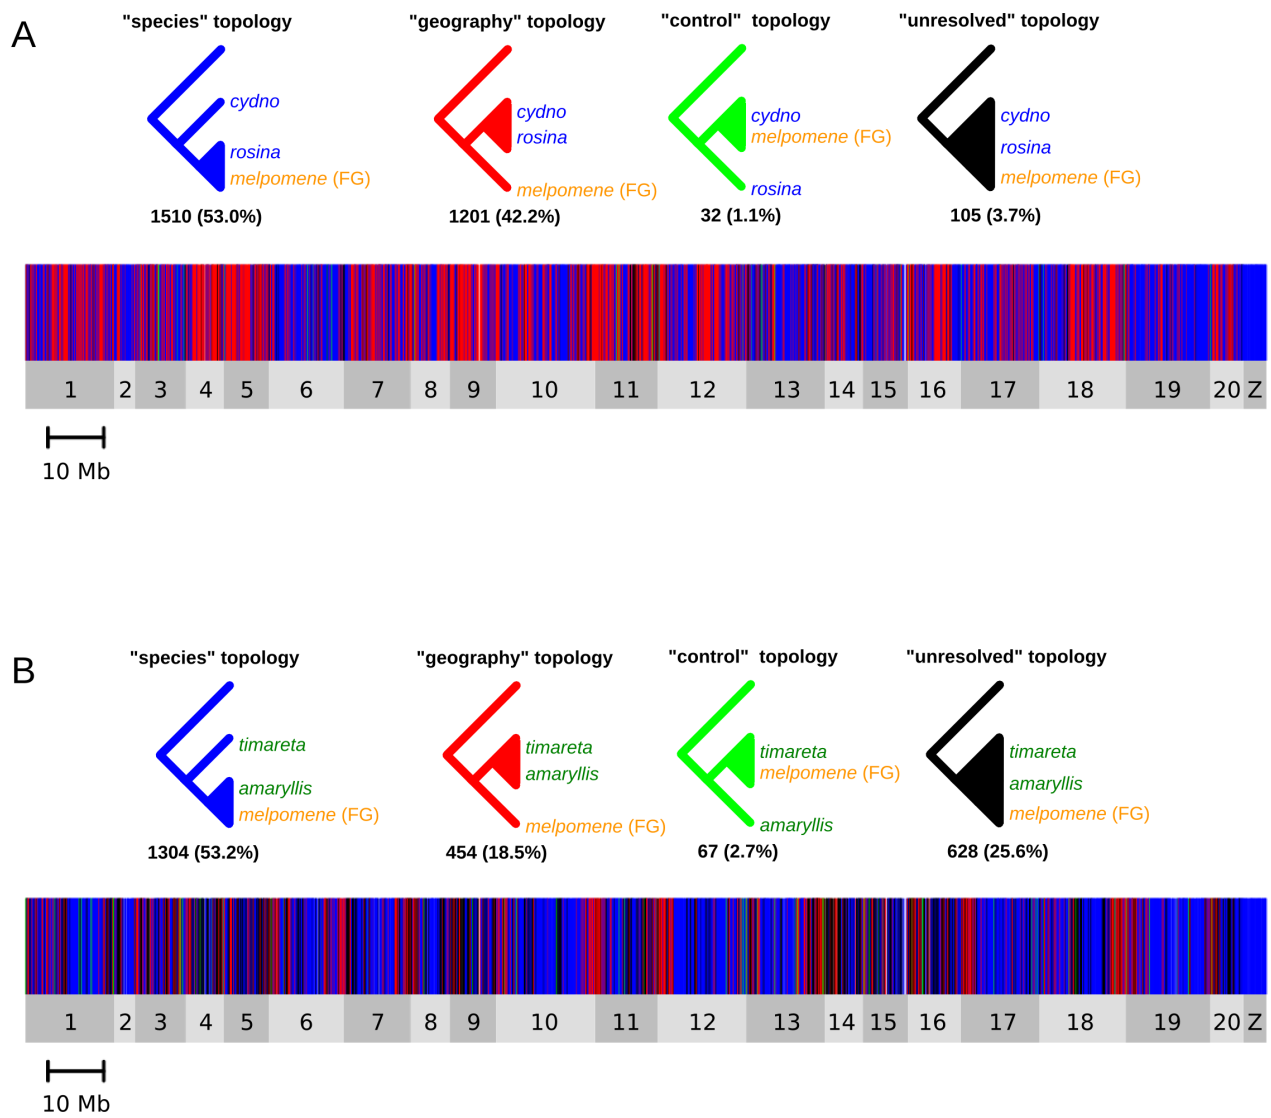

**Figure S4. Distribution of the four types of topologies across the genome.**

Vertical lines represent non-overlapping 100 kb windows, coloured according to the maximal likelihood topology for that window (see Fig. S3 for details).. Chromosomes are indicated with light and dark shading. Scaffolds were ordered according to the *Heliconius melpomene* linkage map (Dasmahapatra et al. 2012).



A

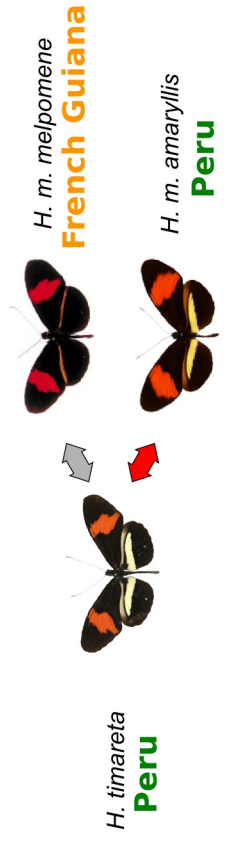

B

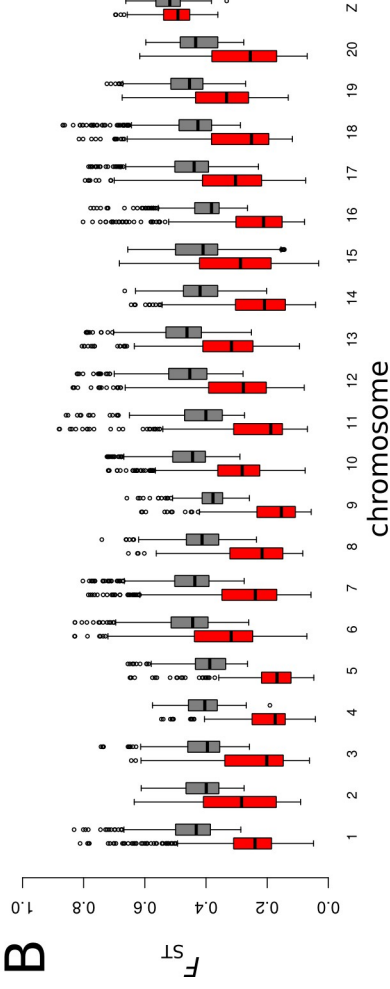

C

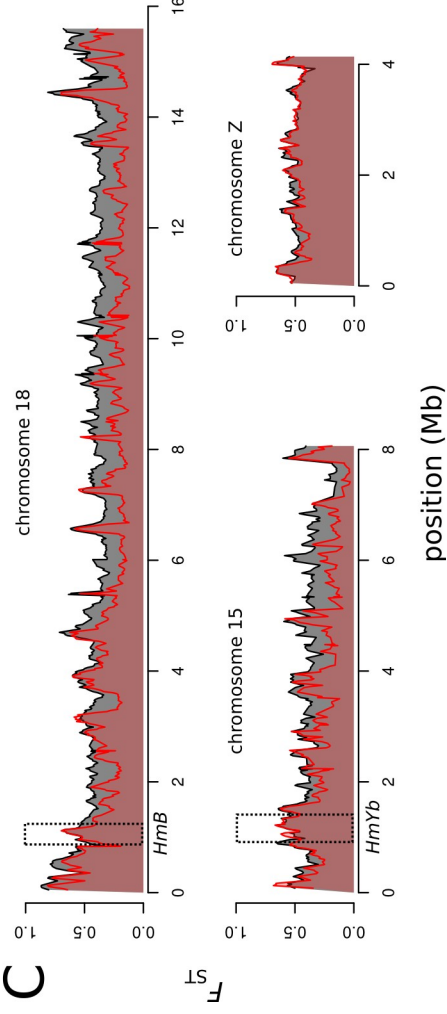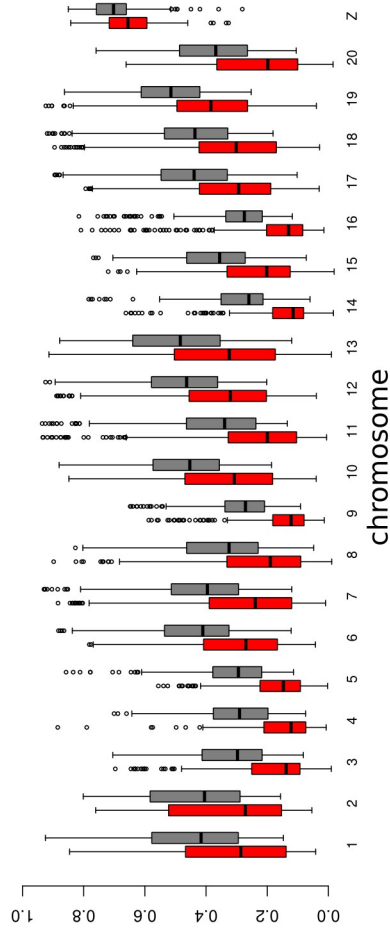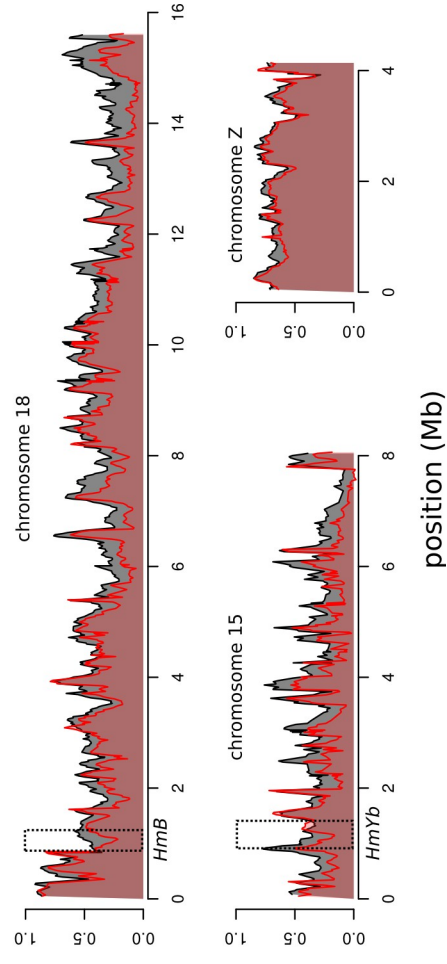

**Figure S5. Comparing  $F_{ST}$  in sympatry and allopatry**

**(A)** Sympatric population pairs from Panama (right) and Peru (left) are indicated by red arrows, with the equivalent allopatric comparison indicated by grey arrows. In both cases the allopatric comparison is with *H. melpomene* from French Guiana. **(B)** Box plots of  $F_{ST}$  for all non-overlapping 100 kb windows, grouped by chromosome, with values for sympatric and allopatric pairs shown in red and grey, respectively. **(C)**  $F_{ST}$  plotted across three selected chromosomes (see Figs S5 & S6 for all chromosomes). The locations of the pattern loci *HmB* (chrom. 18) and *HmYb* (chrom. 15), are indicated by boxes.

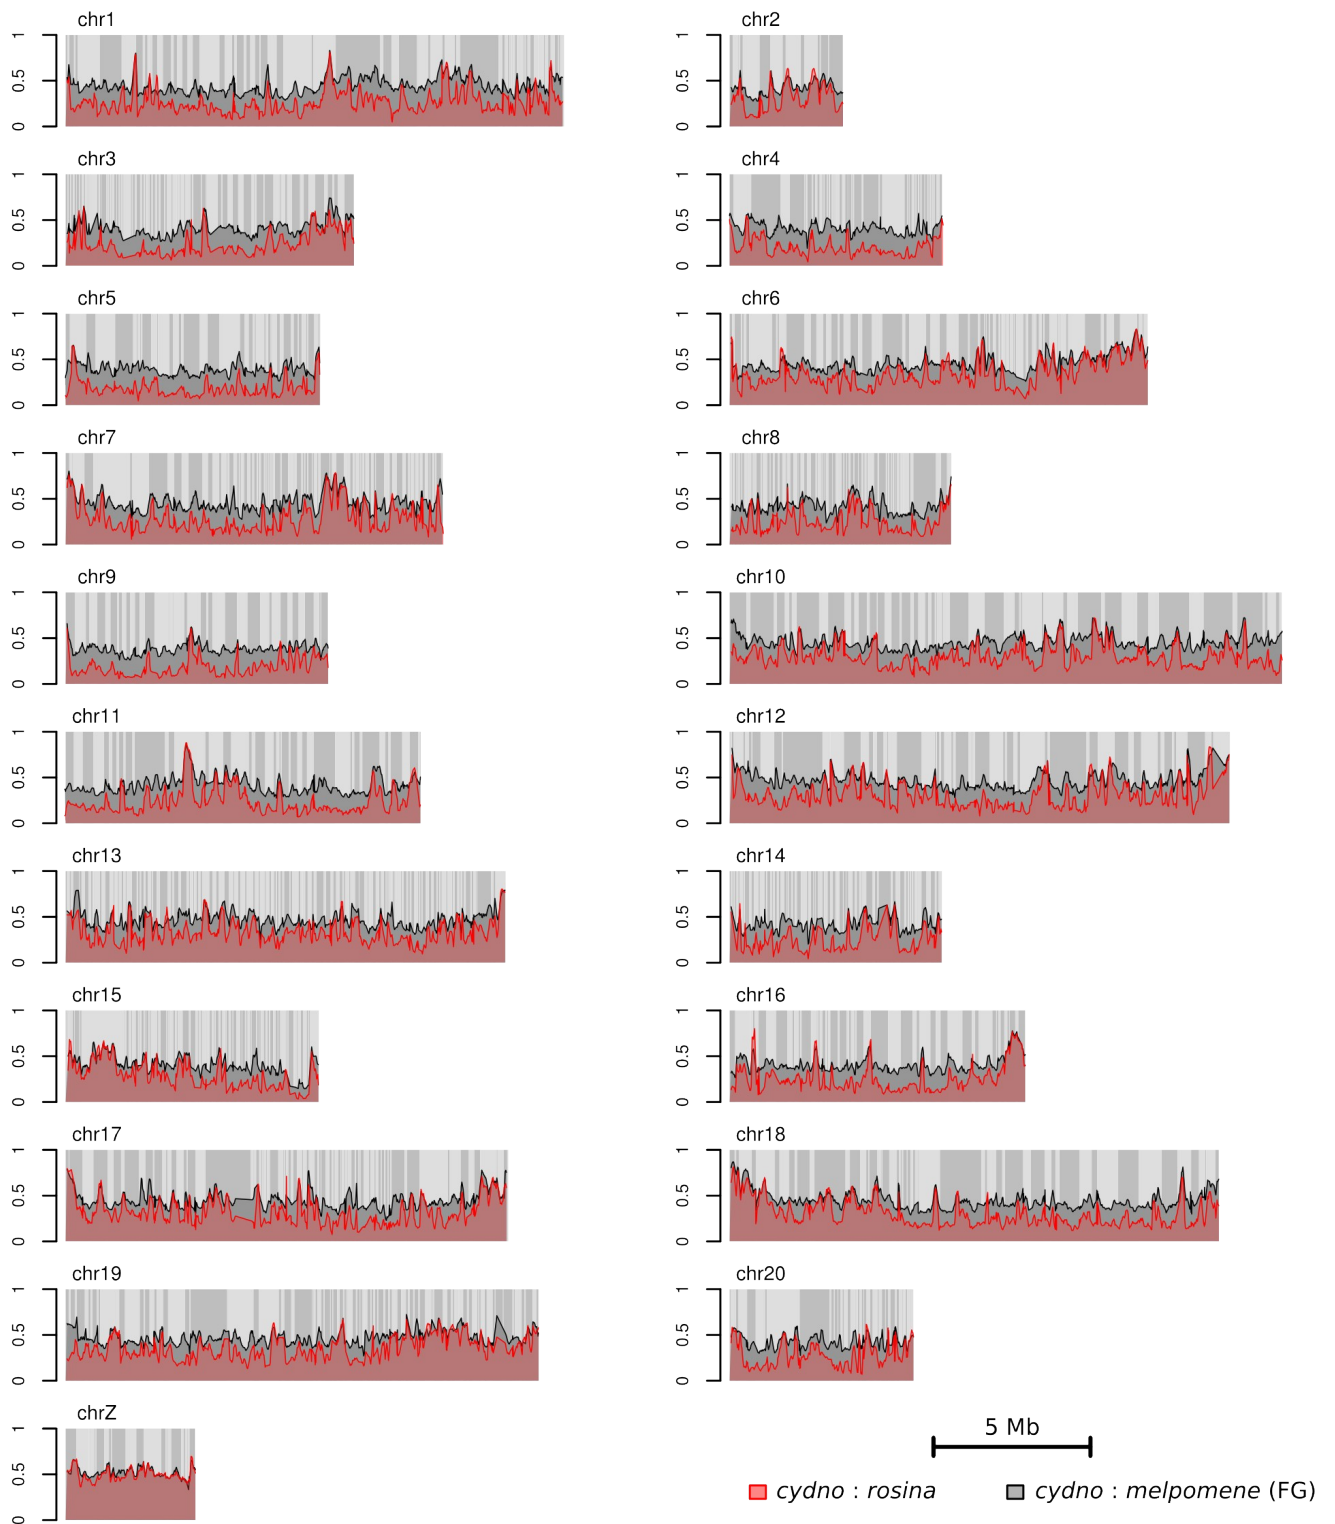

**Figure S6  $F_{ST}$  between *H. cydno* and sympatric and allopatric *H. melpomene* populations**

$F_{ST}$  is averaged over 100 kb windows, sliding in increments of 10 kb.  $F_{ST}$  between *H. cydno* and *H. m. rosina* (sympatric) is shown in red, and between *H. cydno* and *H. m. melpomene* from French Guiana (allopatric) is shown in grey. Scaffolds are indicated by alternating dark and light shading.

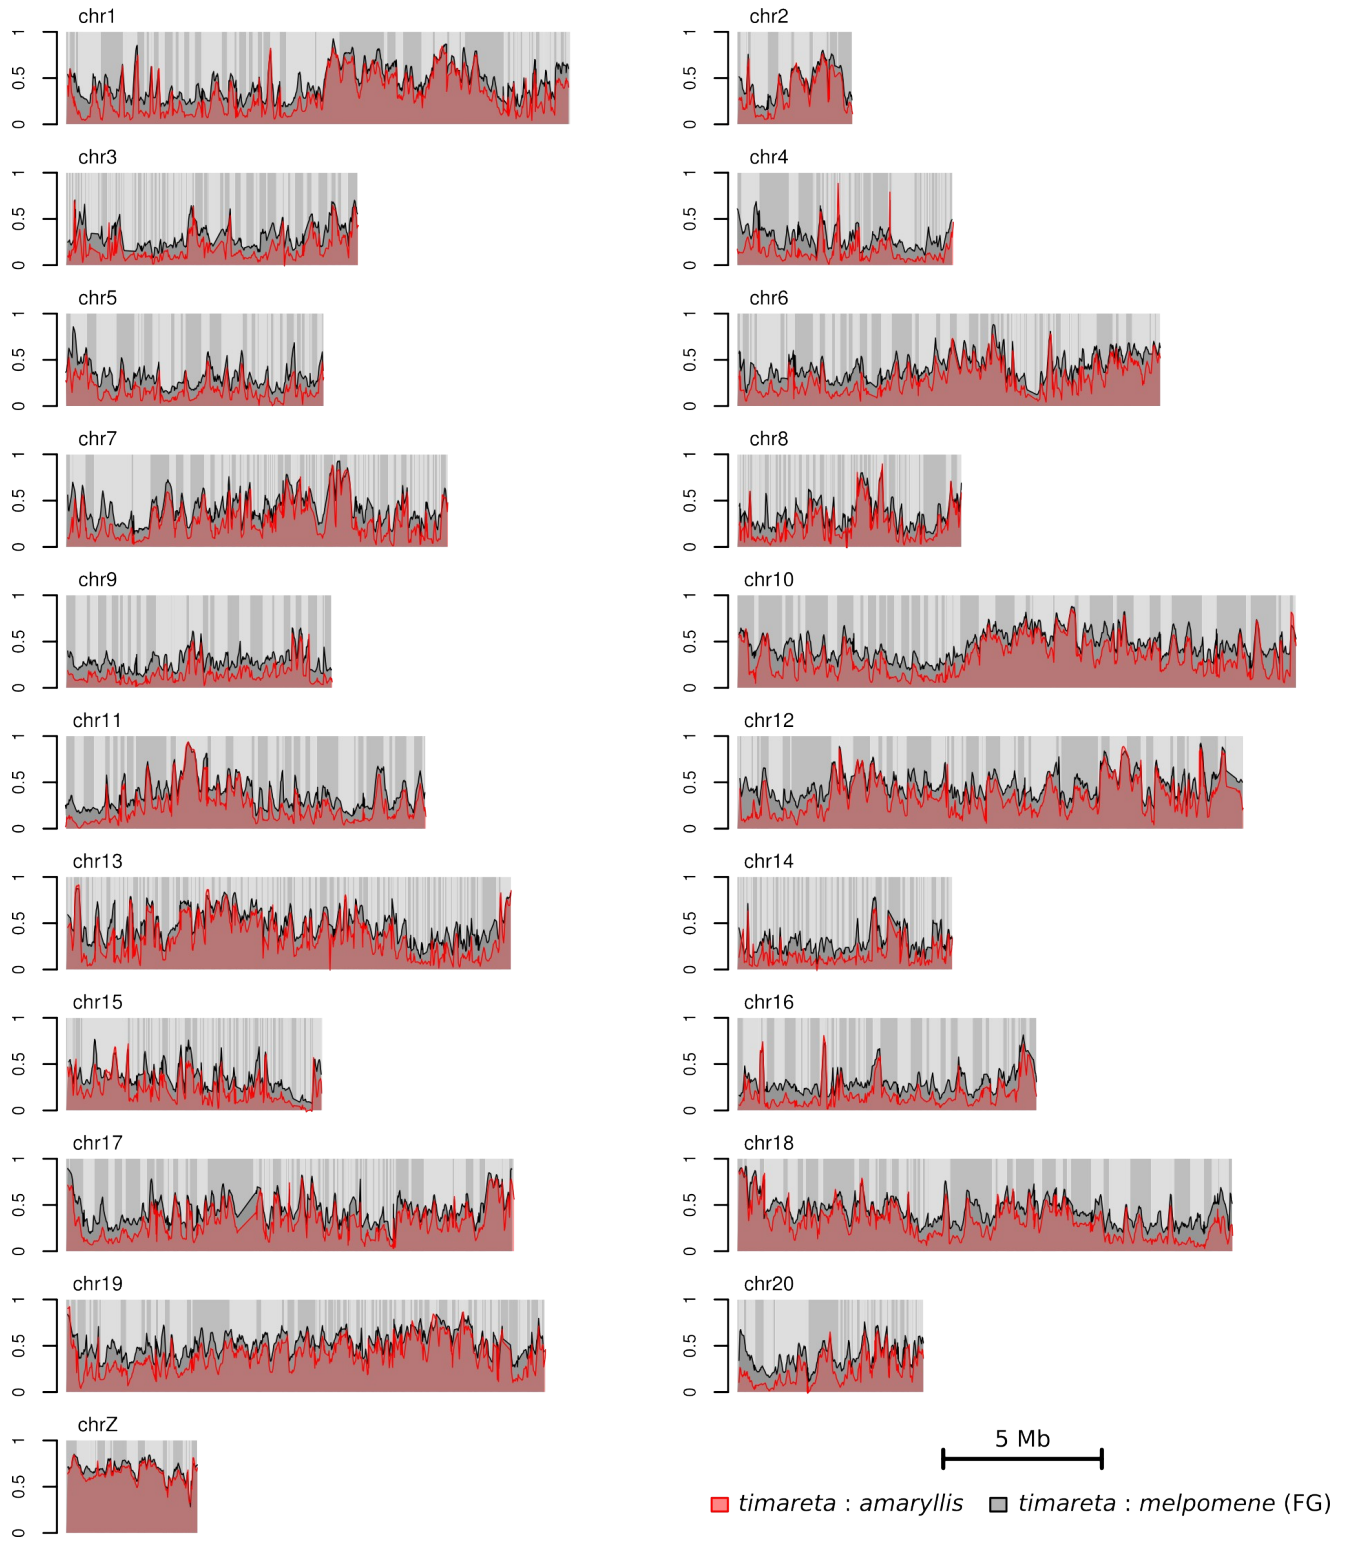

**Figure S7.  $F_{ST}$  between *H. timareta* and sympatric and allopatric *H. melpomene* populations**

$F_{ST}$  is averaged over 100 kb windows, sliding in increments of 10 kb.  $F_{ST}$  between *H. timareta* and *H. m. amaryllis* (sympatric) is shown in red, and between *H. timareta* and *H. m. melpomene* from French Guiana (allopatric) is shown in grey. Scaffolds are indicated by alternating dark and light shading.

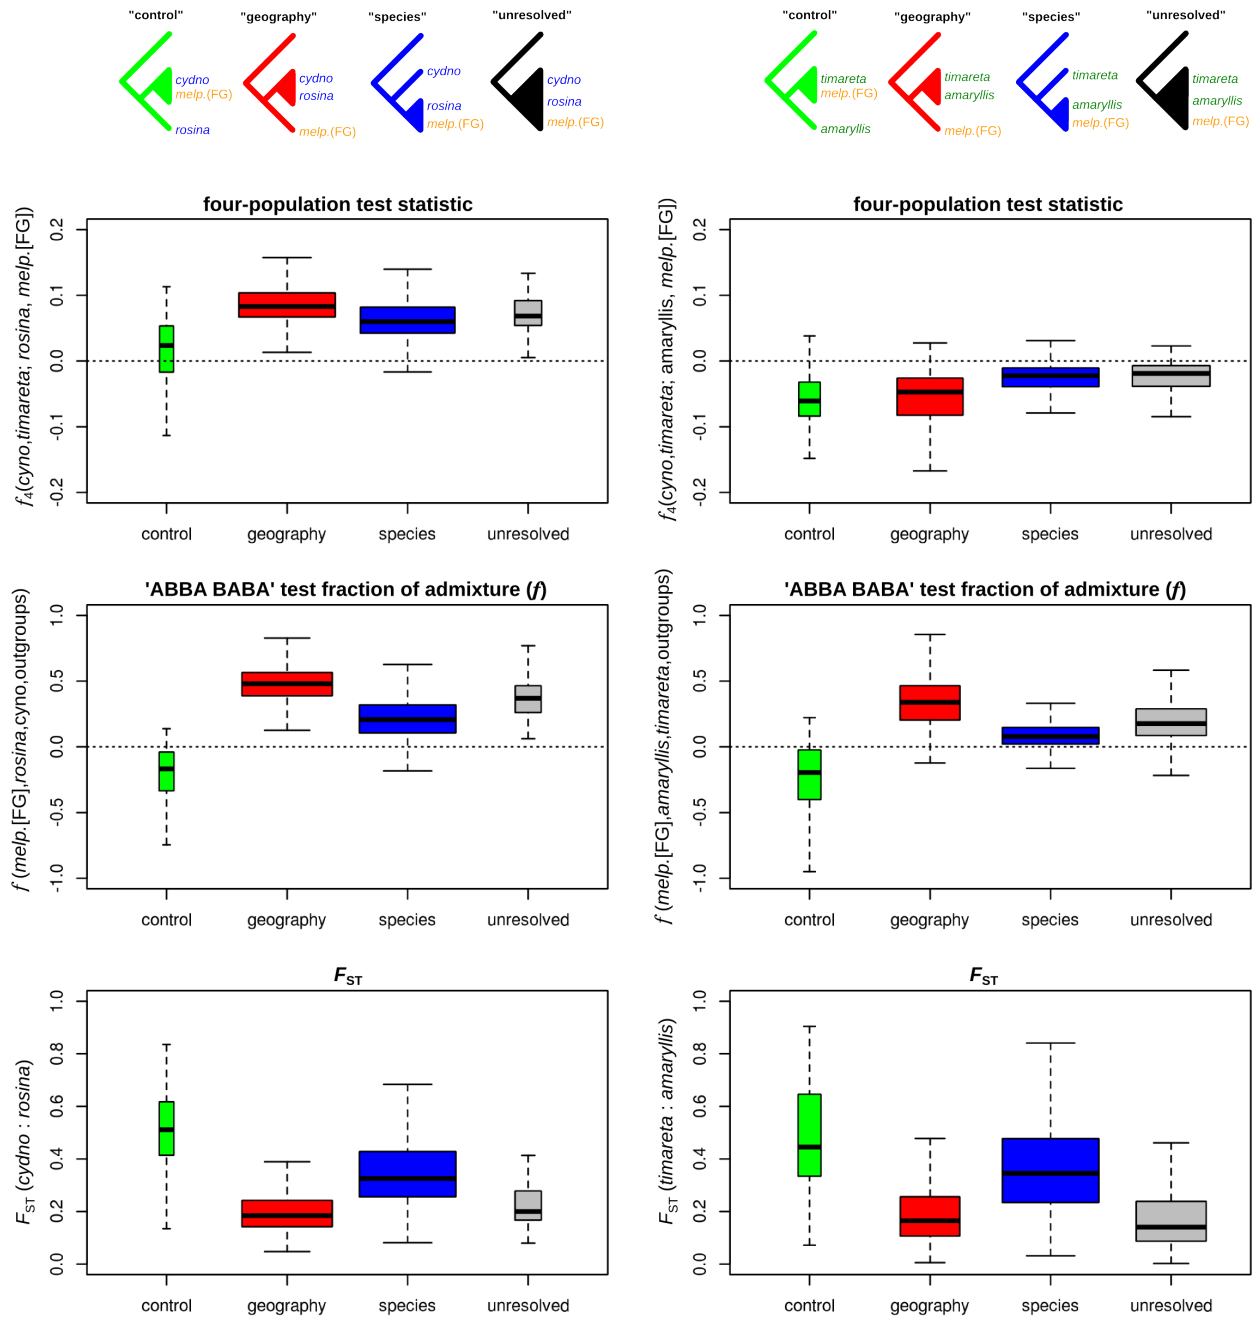

**Figure S8. Concordance between phylogenetic analyses and population genomic estimators**

$f_4$  values from the four population test, fraction of admixture ( $f$ ) estimates from the ABBA BABA analyses and  $F_{ST}$  values between sympatric species for all 100 kb windows are all box-plotted in groups according to the topology supported by the window (see Fig. 2). Box widths were scaled according to the square root of the number of windows in each category.

## Appendix A

### Identification of Z-chromosomal regions

Differences in Illumina sequencing coverage were used to identify Z-linked scaffolds as well as scaffolds which represented Z-autosomal chimeras due to incorrect genome assembly. Since males are diploid for the Z chromosome, but females are haploid, the expected sequencing coverage of Z-linked genomic regions in females should be one half that of males. Median depth of coverage was calculated for each of two male and two female *H. melpomene amaryllis* individuals. Genomic regions masked as repetitive elements and regions without any aligned reads were excluded from the calculation. These point-estimates of coverage depth per scaffold were median normalized within each sample and for each scaffold the mean female and male coverages were compared.

Plotting the log-transformed female:male coverage ratios by scaffold length reveals a few distinct patterns (Fig. A1). First, variance in coverage ratios decreases with scaffold length. This likely reflects a combination of statistical and biological phenomena. Statistically, larger scaffolds represent larger samples of basepairs collecting coverage and therefore will more accurately reflect the ‘true’ sequencing coverage (i.e., the *central limit theorem of probability* in action). Biologically, smaller scaffolds tend to be disproportionately composed of repetitive elements, often collapsed during genome assembly. If repeats are incompletely masked, differences in repeat copy number between individuals will skew estimates of coverage and inflate variance in the ratios between individuals or sexes.

A second general pattern is that scaffolds assigned to autosomes via linkage mapping tend to exhibited equal coverage between sexes, as expected (ref 9 of main paper). Similarly, scaffolds assigned to the Z via linkage mapping typically showed the expected 50% reduction in female coverage. Several more scaffolds previously unassigned to chromosomes showed this same two-fold difference between sexes, indicating they are Z-linked. Curiously, at least a dozen large (> 100 kb) autosomally assigned scaffolds yielded intermediate female:male coverage ratios that fell between the expected values for autosomes or the Z (Fig. A1). One likely explanation for such intermediate values is that these scaffolds are actually Z-autosome chimeras resulting from errors in the genome assembly.

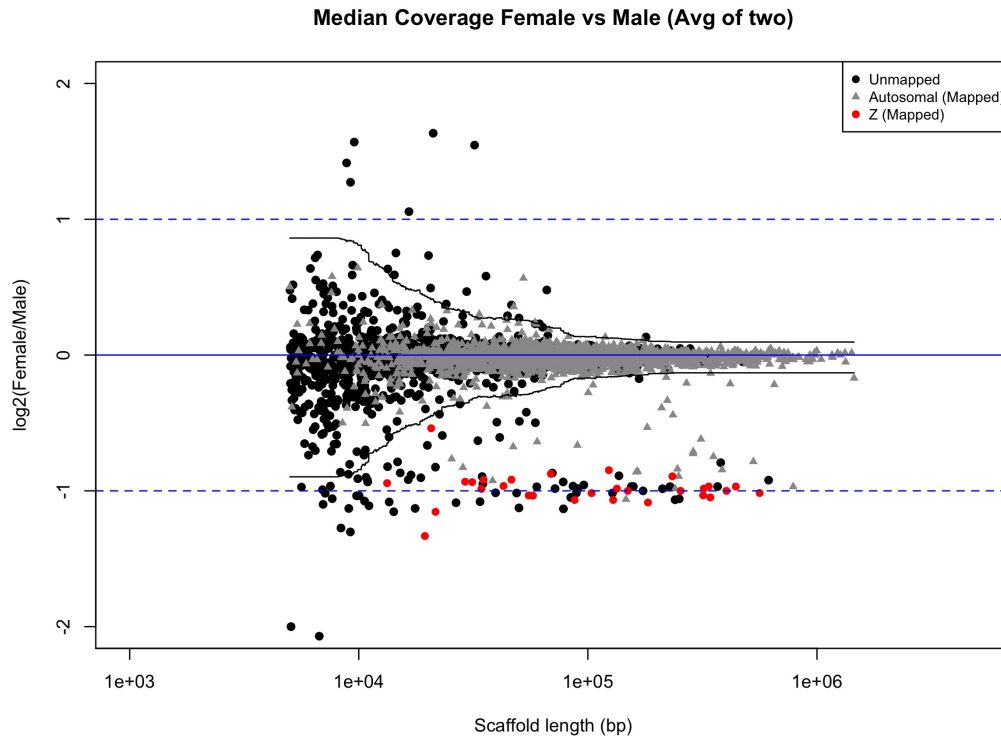

**Figure A1. Relative female:male sequencing coverage.** Relative female:male sequencing coverage of the ~1700 *H. melpomene* genome scaffolds greater than 5 kb in length. Chromosomal assignments (Z or autosomal) reflect linkage mapping results. Black lines indicate two standard deviations away from the median female/male coverage ratio. In this case, the standard deviation was calculated for each scaffold using within-sex comparisons and a window +/- 250 length-ordered scaffolds.

It should be possible to identify such chimeric scaffolds (and putative break points between Z and autosomal sections) by identifying distinct shifts in sequencing coverage in females. A sharp transition from equal to one-half coverage relative to males is expected within a scaffold containing a Z-autosome “fusion”. We identified outlier scaffolds and examined them in detail to search for such Z-autosome chimeras and to confirm a uniform pattern of 50% reduced female coverage for putatively Z-linked scaffolds or regions.

Outlier scaffolds were delineated using a sliding-window analysis of variation in coverage ratios between individuals of the same sex. These within-sex comparisons should capture variation in the data due to technical noise, sampling effects, and biological variation not associated with differences between sexes. Within-sex measures of variation in sequencing coverage can be applied to female-male comparisons to identify scaffolds with extreme differences in coverage between sexes.

We calculated log-transformed coverage ratios between the two males and also between the two



females for all scaffolds greater than 5 kb (Fig. A2). Scaffolds, ordered by length, were grouped in “windows” of 500 scaffolds and the standard deviation of within-sex coverage log-ratios was calculated in each window, advancing one scaffold at a time. This provided a length-appropriate measure of variation in coverage for each scaffold. Values from the largest and smallest terminal windows were applied uniformly to the 250 largest and smallest scaffolds, respectively. Scaffolds were considered outliers when the female:male coverage log-ratio was greater than two standard deviations away from the median of all scaffolds in the female:male comparison. The standard deviation value applied to each scaffold was the within-sex window centered on that scaffold (Fig. A1). 158 outlier scaffolds were identified in this manner, the vast majority of which showed reduced female coverage.

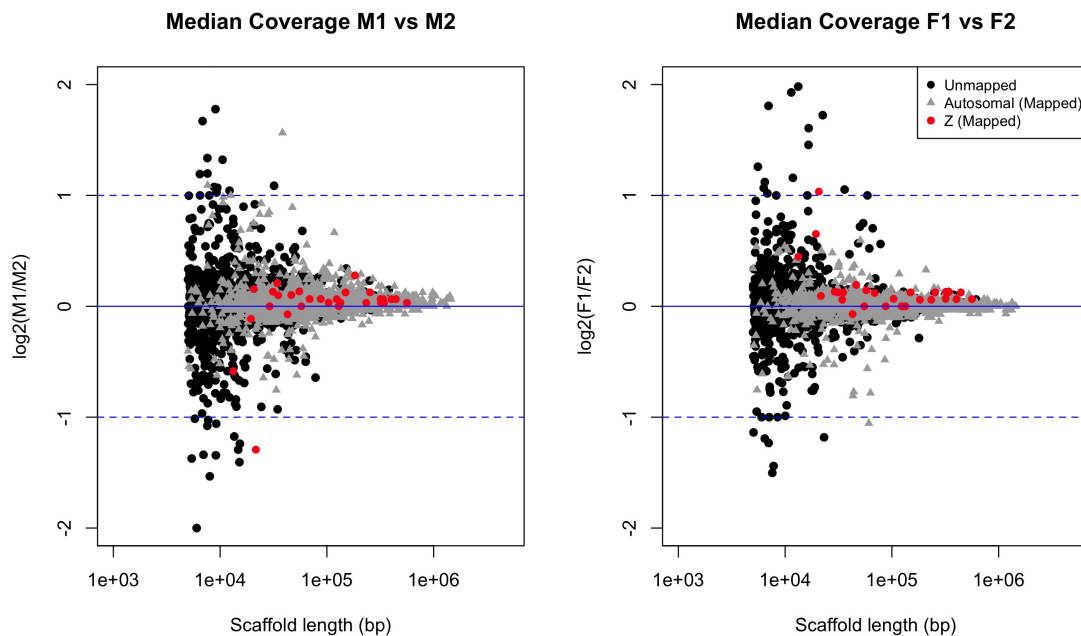

**Figure A2. Within-sex ratios of sequencing coverage for all scaffolds longer than 5kb.** Chromosomal assignments (Z or autosomal) reflect linkage mapping results.

A detailed investigation of sequencing coverage was conducted for these 158 outlier scaffolds. For each scaffold, a high-resolution plot of sequencing coverage was generated for each of the four *H. melpomene amaryllis* samples, this time without masking repeats. Figure A3 shows one such plot. Additionally, a sliding window of mean female:male coverage log-ratio helped visualize and pinpoint shifts in sequencing coverage along the scaffold. The window size considered was 10 kb for scaffolds longer than 100kb and was 10% of the scaffold length for those shorter than 10 kb. The window was shifted by increments of 100 bp. Putative breakpoints between Z-linked and autosomal regions were inferred from the absolute value of the difference between adjacent



windows. In theory, this value should be maximized at the fusion point of Z-linked and autosomal scaffold regions.

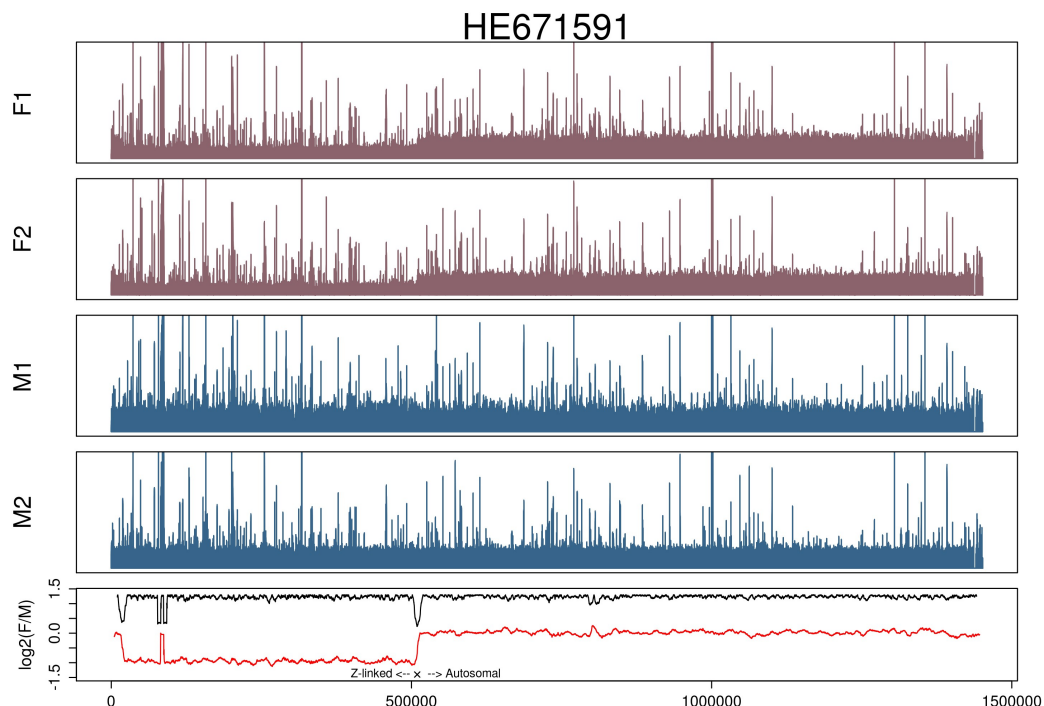

**Figure A3. Coverage for scaffold HE671591.** High-resolution plot of coverage for scaffold HE671591 demonstrating the Z-autosome chimeric breakpoint near 500 kb. The top four panels show coverage depths across the scaffold for the two female (F) and male (M) *H. melpomene amaryllis*. Coverage is normalized to arbitrary units to facilitate direct comparison between samples. In the bottom panel, the red line shows a 10kb sliding window of  $\log_2$  (female:male) coverage. The black line, which is not drawn to scale vertically, reflects the negative absolute value of the difference between adjacent sliding windows. The “X” indicates the inferred breakpoint between Z-linked and autosomal sections of this scaffold.

Plots of each of the outlier scaffolds were individually inspected and scaffolds were judged as being entirely Z-linked, entirely autosomal, or chimeric. In addition to the 158 outlier scaffolds identified among scaffolds longer than 5kb, we inspected coverage plots for five scaffolds smaller than 5kb. These five shorter scaffolds received special attention because they contained coding sequences and also yielded female:male log-ratios below -0.6.

Thirty-two scaffolds were judged to be chimeric and were split at putative breakpoints for subsequent genomic analyses. In cases where chimeric scaffolds had been assigned to an autosome via linkage mapping, that assignment was retained for the autosomal section of the split scaffold. After manual inspection, splitting chimeras, and assigning Z-linkage, the total amount of Z-linked

sequence was 13.05 mb spread across 96 scaffolds. Assignment of Z-linkage from coverage was quite consistent with previous results from linkage mapping. While four Z-mapped scaffolds contained some autosomal regions, none of the other 34 Z-mapped scaffolds were incorrectly assigned to autosomes.

Revised plots of female:male log-ratio by scaffold length reflecting the coverage-based analysis of Z-linkage show much more consistent clustering of scaffolds around the expected log-ratios of -1 for Z-linked and 0 for autosomes (Fig. A4). This is especially true for scaffolds longer than 100 kb. Several scaffolds shorter than 100kb still exhibit intermediate log-ratios that fall between the expected values. There are even a few cases where autosomally mapped scaffolds cluster with otherwise Z-linked scaffolds. These cases arise from substantial variation in sequencing coverage within or between individuals apparently arising from copy-number variation that is not consistent with Z-linkage. For example, in the autosomally mapped scaffold HE670616, coverage is comparable across the scaffold for both females and one male sample (Figure A5). The remaining male sample has a distinct increase in coverage which causes the overall female:male log-ratio to be -0.92. Such a pattern is much more consistent with an autosomal CNV than sex-linkage.

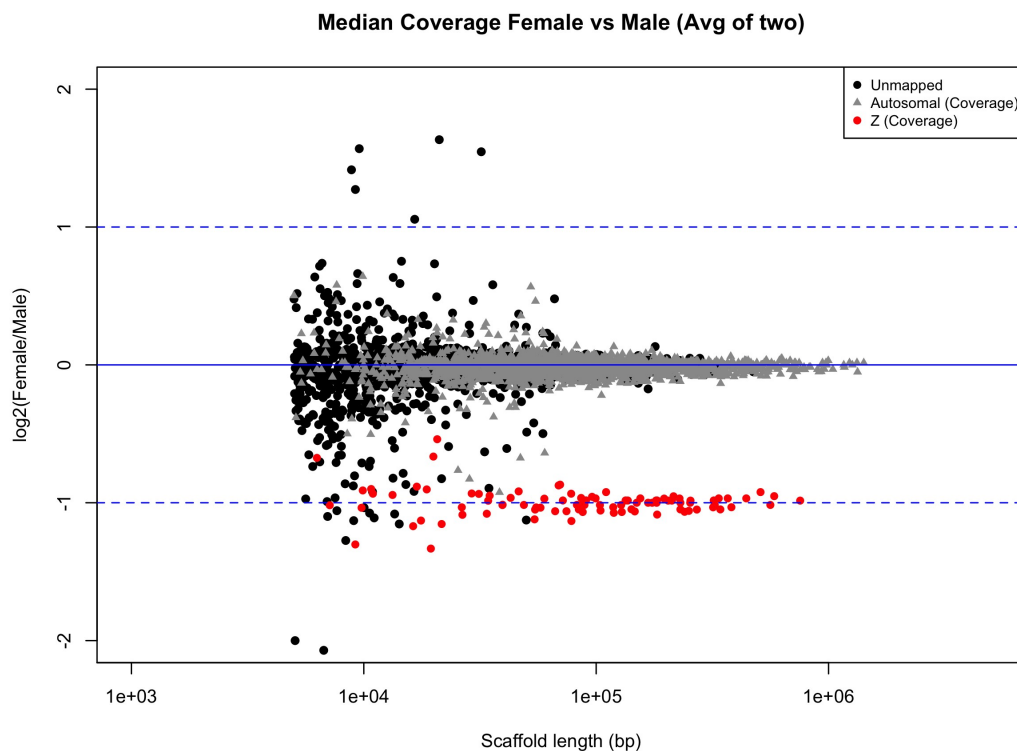

**Figure A4. Relative female:male sequencing coverage.** Relative female:male sequencing coverage of the ~1700 H. melpomene genome scaffolds greater than 5 kb in length after evaluating Z-linkage based on coverage. Red dots indicate Z-linkage based on coverage analysis while grey triangles indicate scaffolds assigned to autosomes via linkage mapping.

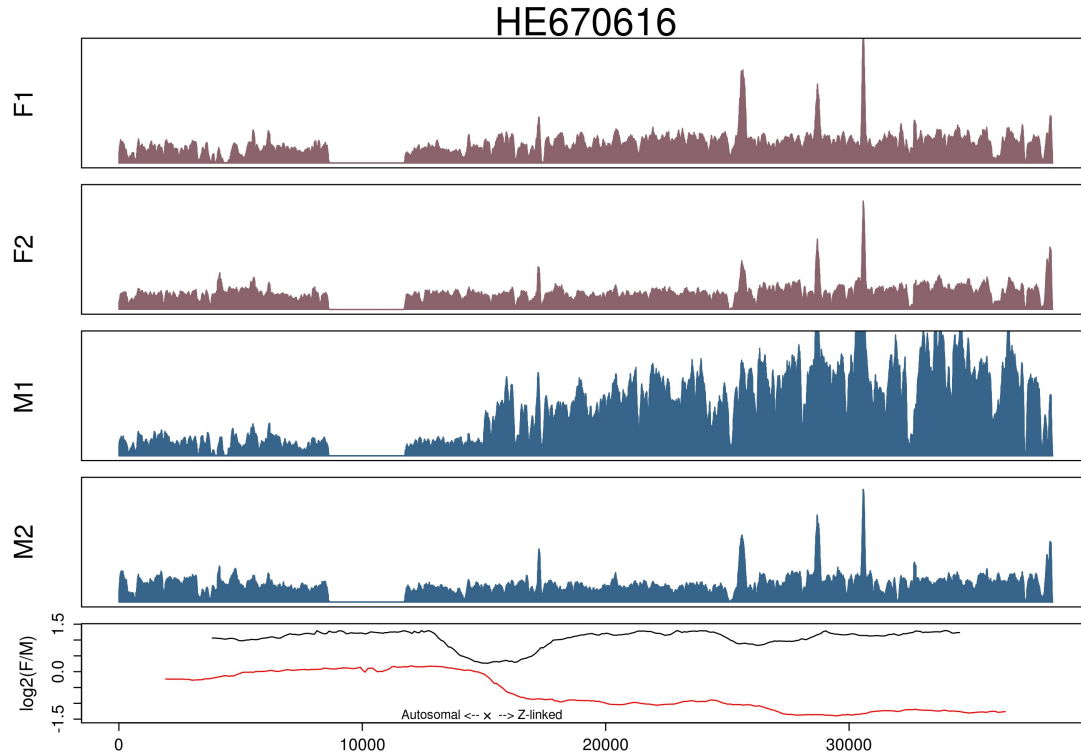

**Figure A5. Coverage for scaffold HE67016.** Scaffold HE67016 was mapped to an autosome but shows a scaffold-wide coverage log-ratio of -.9 when male & female samples are averaged. However the anomalously high coverage in the first male sample strongly skews the average value, while the second male's coverage is comparable to females. Plot details are as described in Fig. A3

In conclusion, we believe that this analysis of sequencing coverage between males and females has greatly increased resolution and confidence in Z-linked portions of the *H. melpomene* genome assembly. This result is an important foundation in future functional and evolutionary studies of sex-chromosome in this species and other lepidopterans.
